# Supplementary material for: Assessment of Neurodevelopment in Infants With and Without Exposure to Asymptomatic or Mild Maternal SARS-CoV-2 Infection During Pregnancy
Source: PubMed Central journal article supplement (PMC10087058; doi:10.1001/jamanetworkopen.2023.7396), 2023-04-10
Supplement: jamanetwopen-e237396-s002.pdf [file jamanetwopen-e237396-s002.pdf]

## **Data Sharing Statement**

### **Data**

**Data available:** No
